# Supplementary material for: Therapeutic Effects of Mesenchymal Stem Cell–Derived Extracellular Vesicles from Different Tissue Sources on Diminished Ovarian Reserve and the Related Mechanisms
Source: Research Square preprint supplement (doi:10.21203/rs.3.rs-8337407/v1), 2025-12-22
Supplement: Supplementary file 1 [file c7eb58ebd216305349ffa99f.docx]

**Therapeutic Effects of Mesenchymal Stem Cell–Derived Extracellular Vesicles from Different Tissue Sources on Diminished Ovarian Reserve and the Related Mechanisms**

Jialin Li1234#, Mengqing Gu1234#, Yibo Wang12346, Yanan Qi1234, Wenfeng Xie1234, Yichuan Zhang1234, Lin Fu1234, Yandong Chen5, Xinpei Sun5, Yanru Lou1234, Yaodong Zhang1234, Yang Yu1234578*, Rui Yang1234*

1State Key Laboratory of Female Fertility Promotion, Center for Reproductive Medicine, Department of Obstetrics and Gynecology, Peking University Third Hospital, Beijing 100191, China

2National Clinical Research Center for Obstetrics and Gynecology, Beijing 100191, China

3Key Laboratory of Assisted Reproduction (Peking University), Ministry of Education, Beijing 100191, China

4Beijing Key Laboratory of Reproductive Endocrinology and Assisted Reproductive Technology, Beijing 100191, China

5Clinical Stem Cell Research Center, Peking University Third Hospital, Beijing 100191, China

6Key Laboratory for Major Obstetric Diseases of Guangdong Province, The Third Affiliated Hospital of Guangzhou Medical University, Guangzhou 510150, China

7Beijing Advanced Center of Cellular Homeostasis and Aging-Related Diseases, Institute of Advanced Clinical Medicine, Peking University, Beijing, China

8Frontiers Medical Center, Tianfu Jincheng Laboratory, Chengdu, China

Corresponding author:

Rui Yang and Yang Yu are co-corresponding authors.

Rui Yang : yrjeff@126.com

Yang Yu : yuyang5012@hotmail.com

Jialin Li and Mengqing Gu contributed equaly to this work.

Jialin Li: https://orcid.org/0000-0003-3682-1495

Mengqing Gu: https://orcid.org/0009-0002-2737-7126

Rui Yang: https://orcid.org/0000-0002-6381-5202

Yang Yu: https://orcid.org/0000-0002-4310-1966

**Supplementary Figures**

**
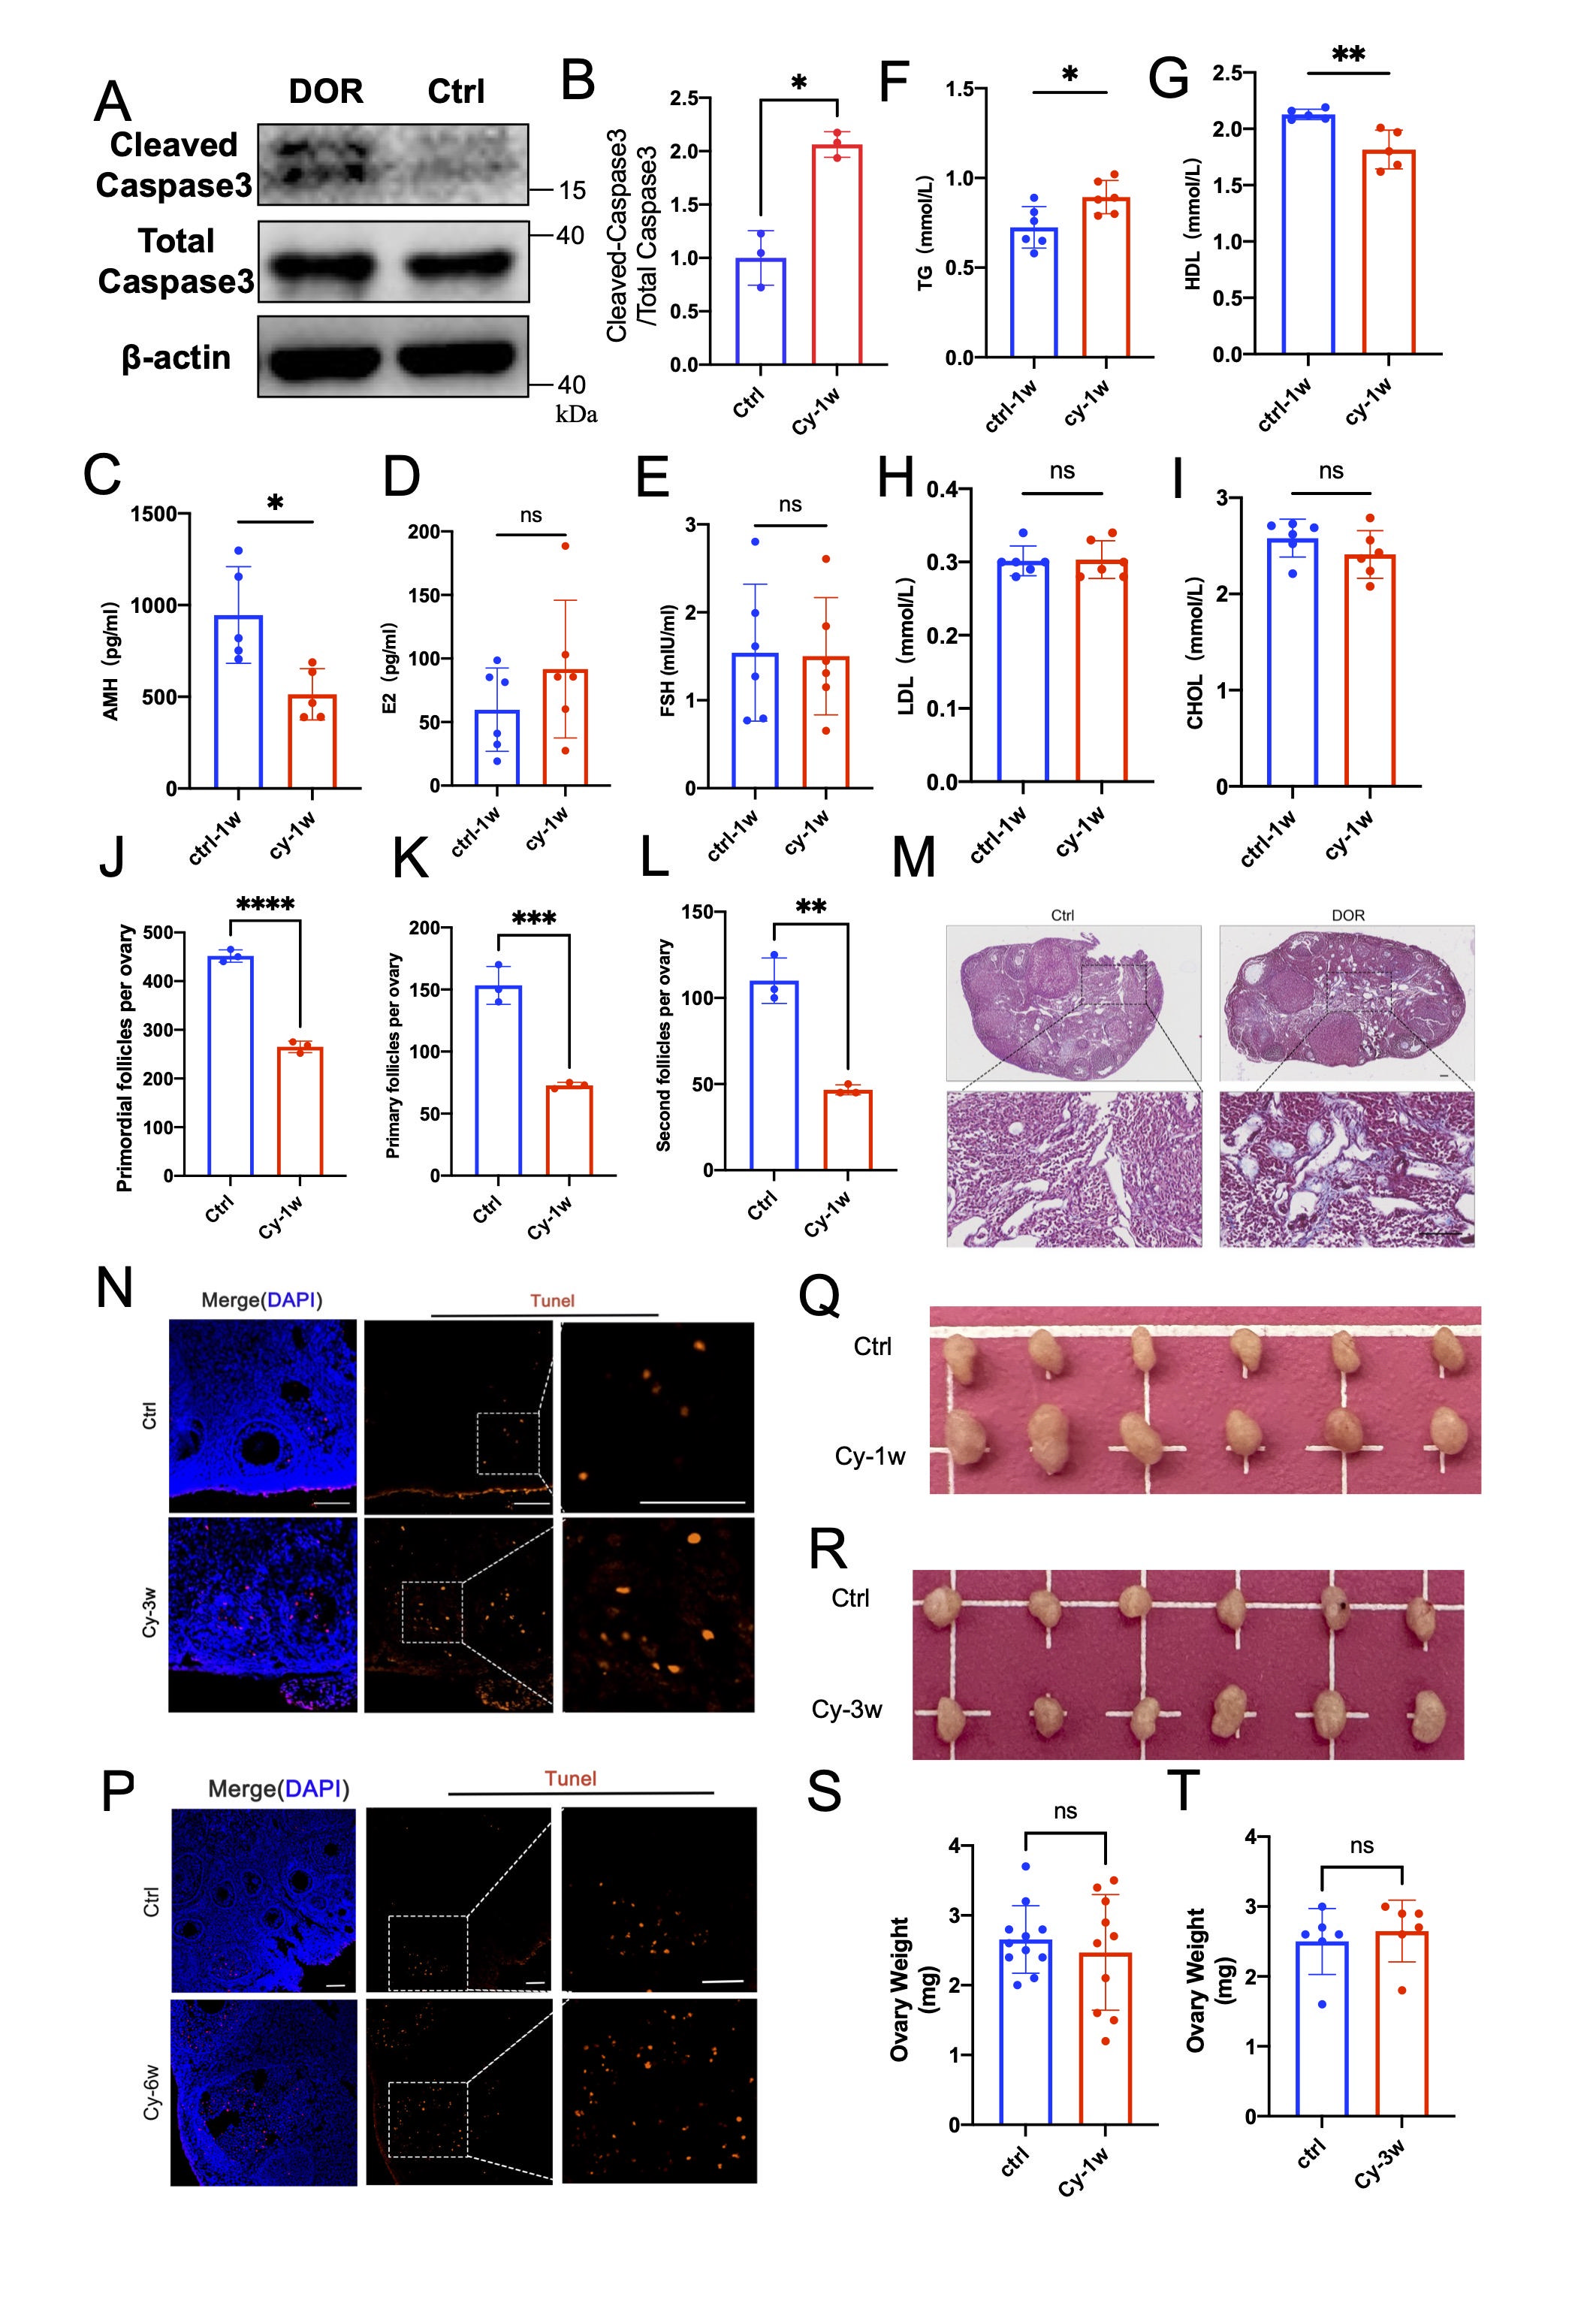
**

**Supplementary Fig. S1** Establishment of the Cy-induced DOR mouse model. (A–B) Protein expression levels of Cleaved-Caspase3 in ovary. (C–E) Serum levels of AMH, E2, and FSH between DOR and Ctrl. (F–I) Serum levels of TG, HDL, LDL, and CHOL. (J–L) Quantification of primordial, primary, and secondary follicles in the ovary. (M) Masson’s trichrome staining of the ovary. Scale bars, 100 μm. (N-P) Tunel staining of ovaries at 3 and 6 weeks after Cy treatment. Scale bars, 100 μm. (Q–T) Morphological and weight changes of ovaries at 1 and 3 weeks after Cy treatment. *P < 0.05, **P < 0.01, ***P < 0.001, Statistical significance was

determined by one-way ANOVA followed two-tailed Student’s t-test.

**
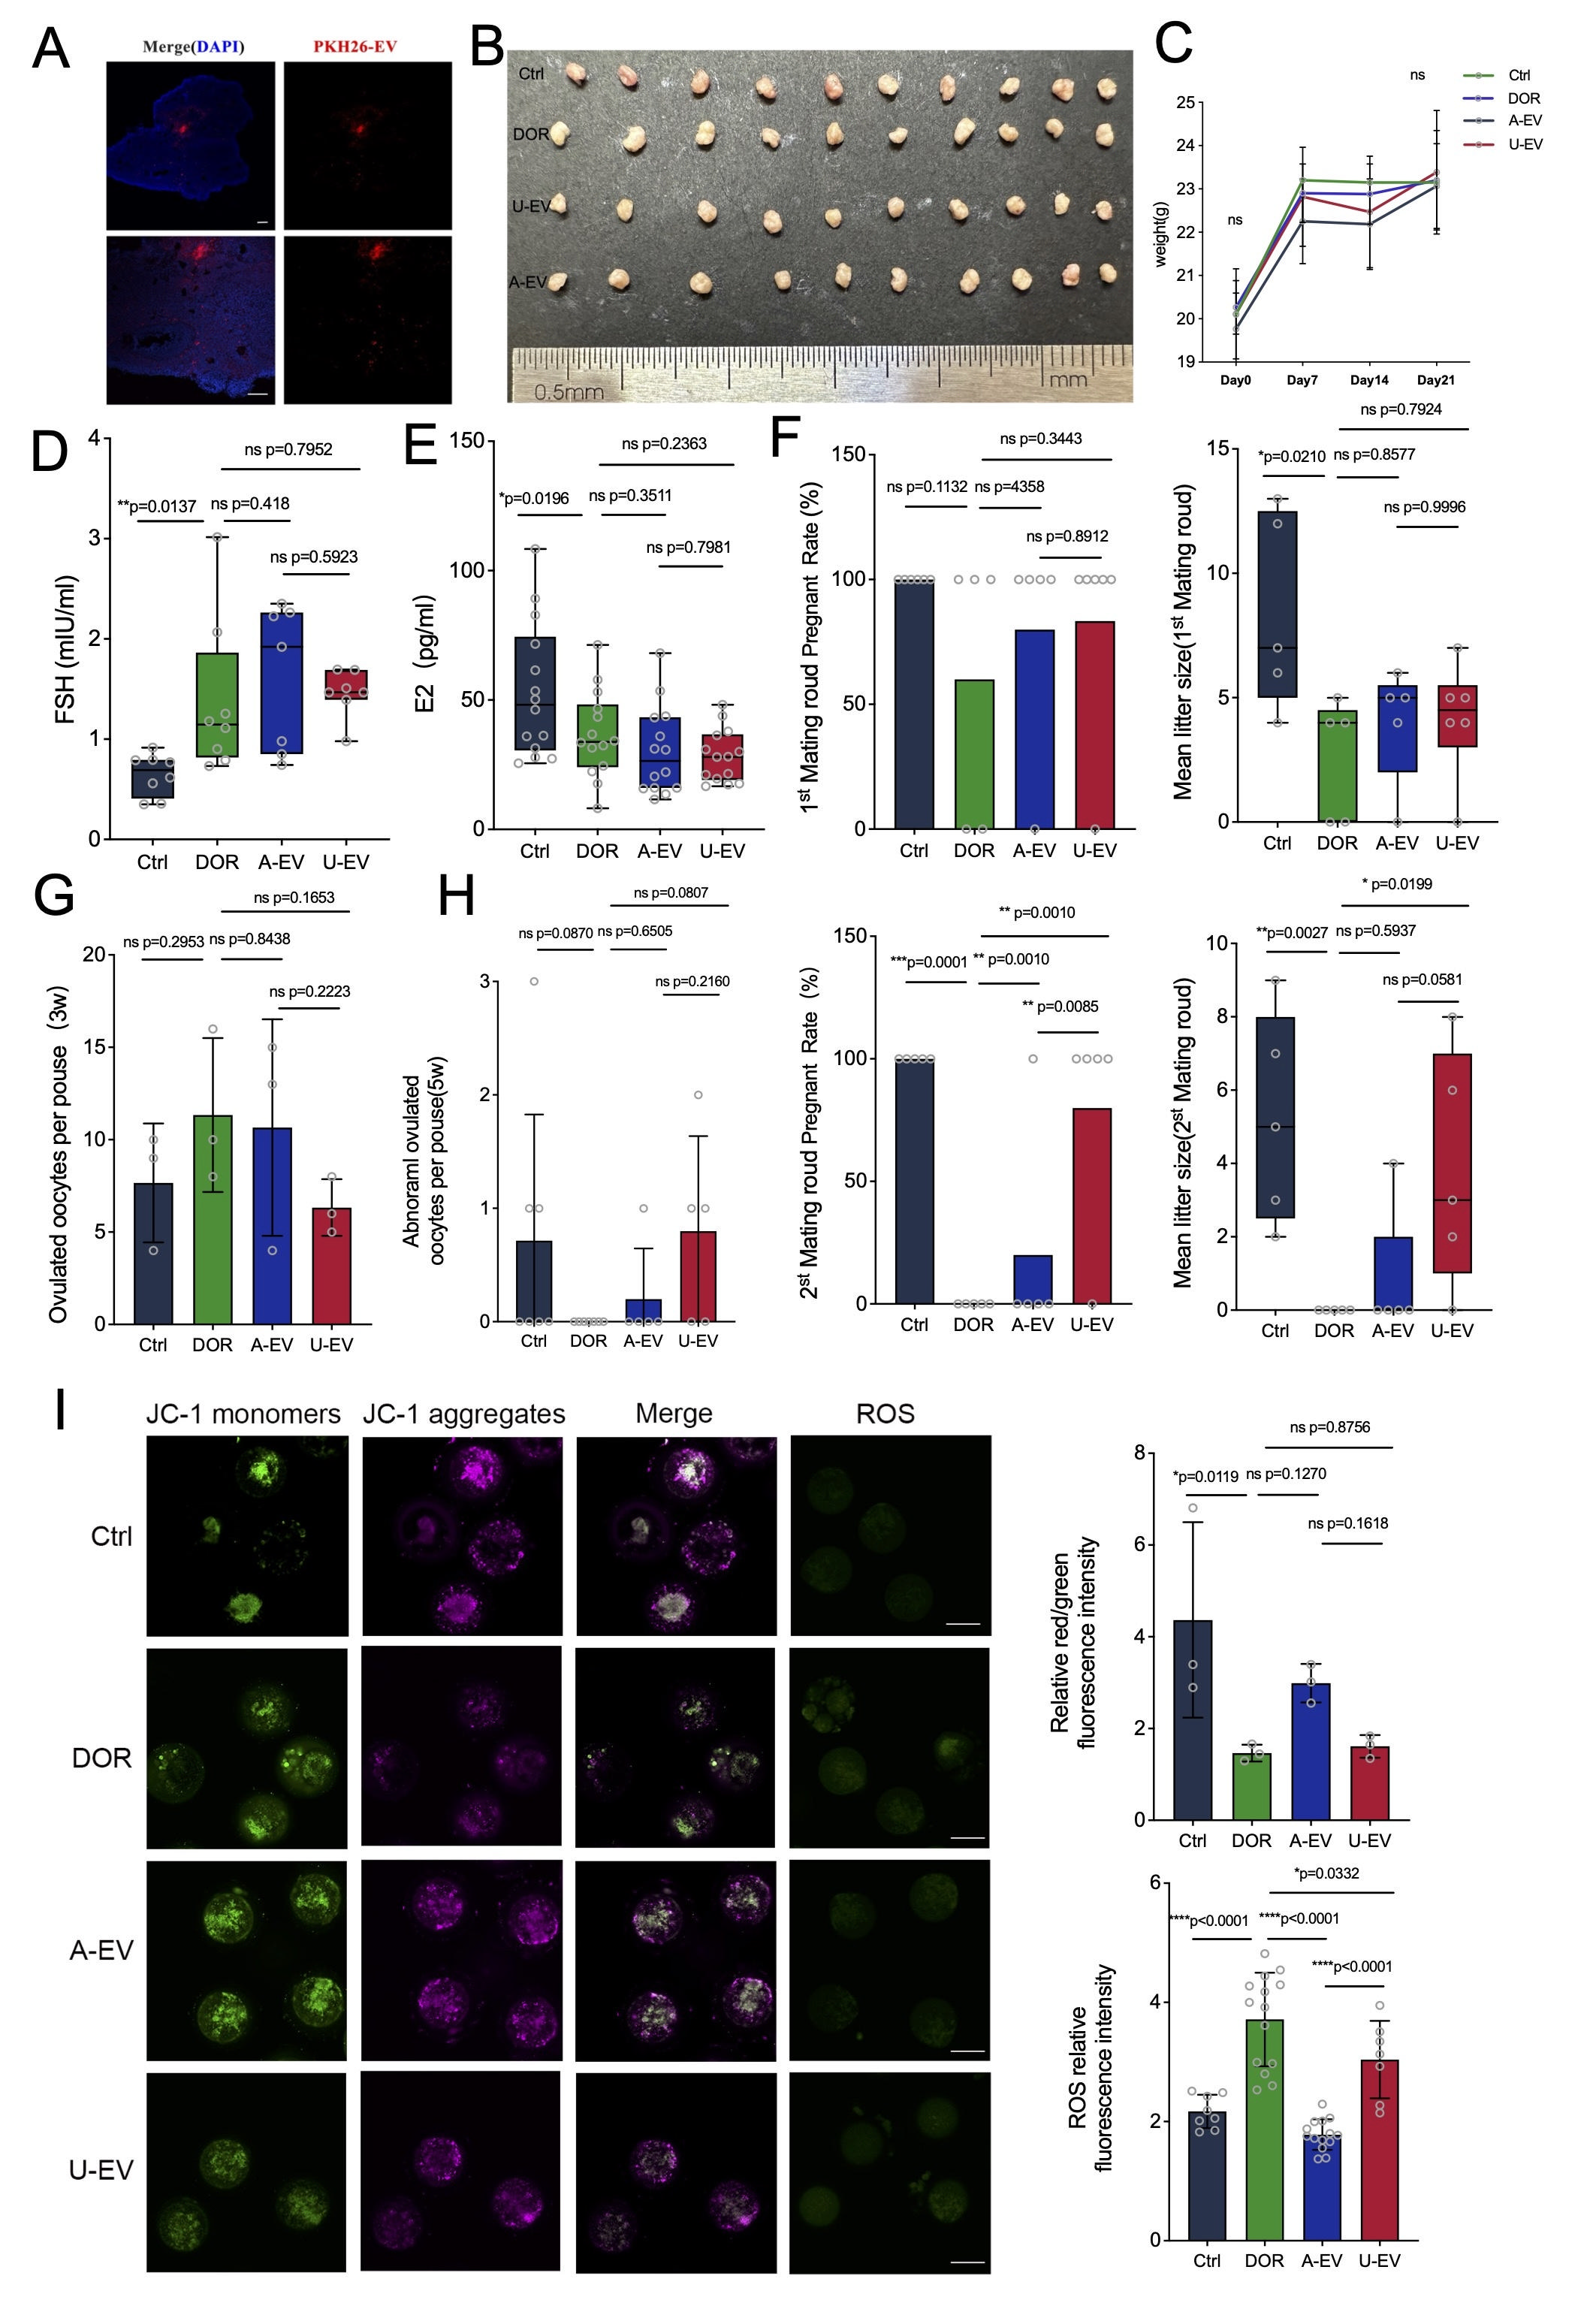
**

**Supplementary Fig. S2** A-EV and U-EV improve ovarian function and fertility in DOR mice. (A) Distribution of PKH26-labeled EVs in ovaries 12 h after intraovarian injection. Scale bars, 100 μm. (B) Ovarian morphology at 3 weeks after EV treatment. (C) Body weight monitoring after EV treatment. (D–E) Serum FSH and E2 levels in mice. (F) Pregnancy rate and litter size in the first and second breeding tests. (G) Number of ovulated oocytes in the ovulation test at 3 weeks. (H) Number of abnormally ovulated oocytes in the ovulation test at 5 weeks. (I) JC-1 and ROS staining of oocytes in the 3-week ovulation test. Scale bars, 50 μm.


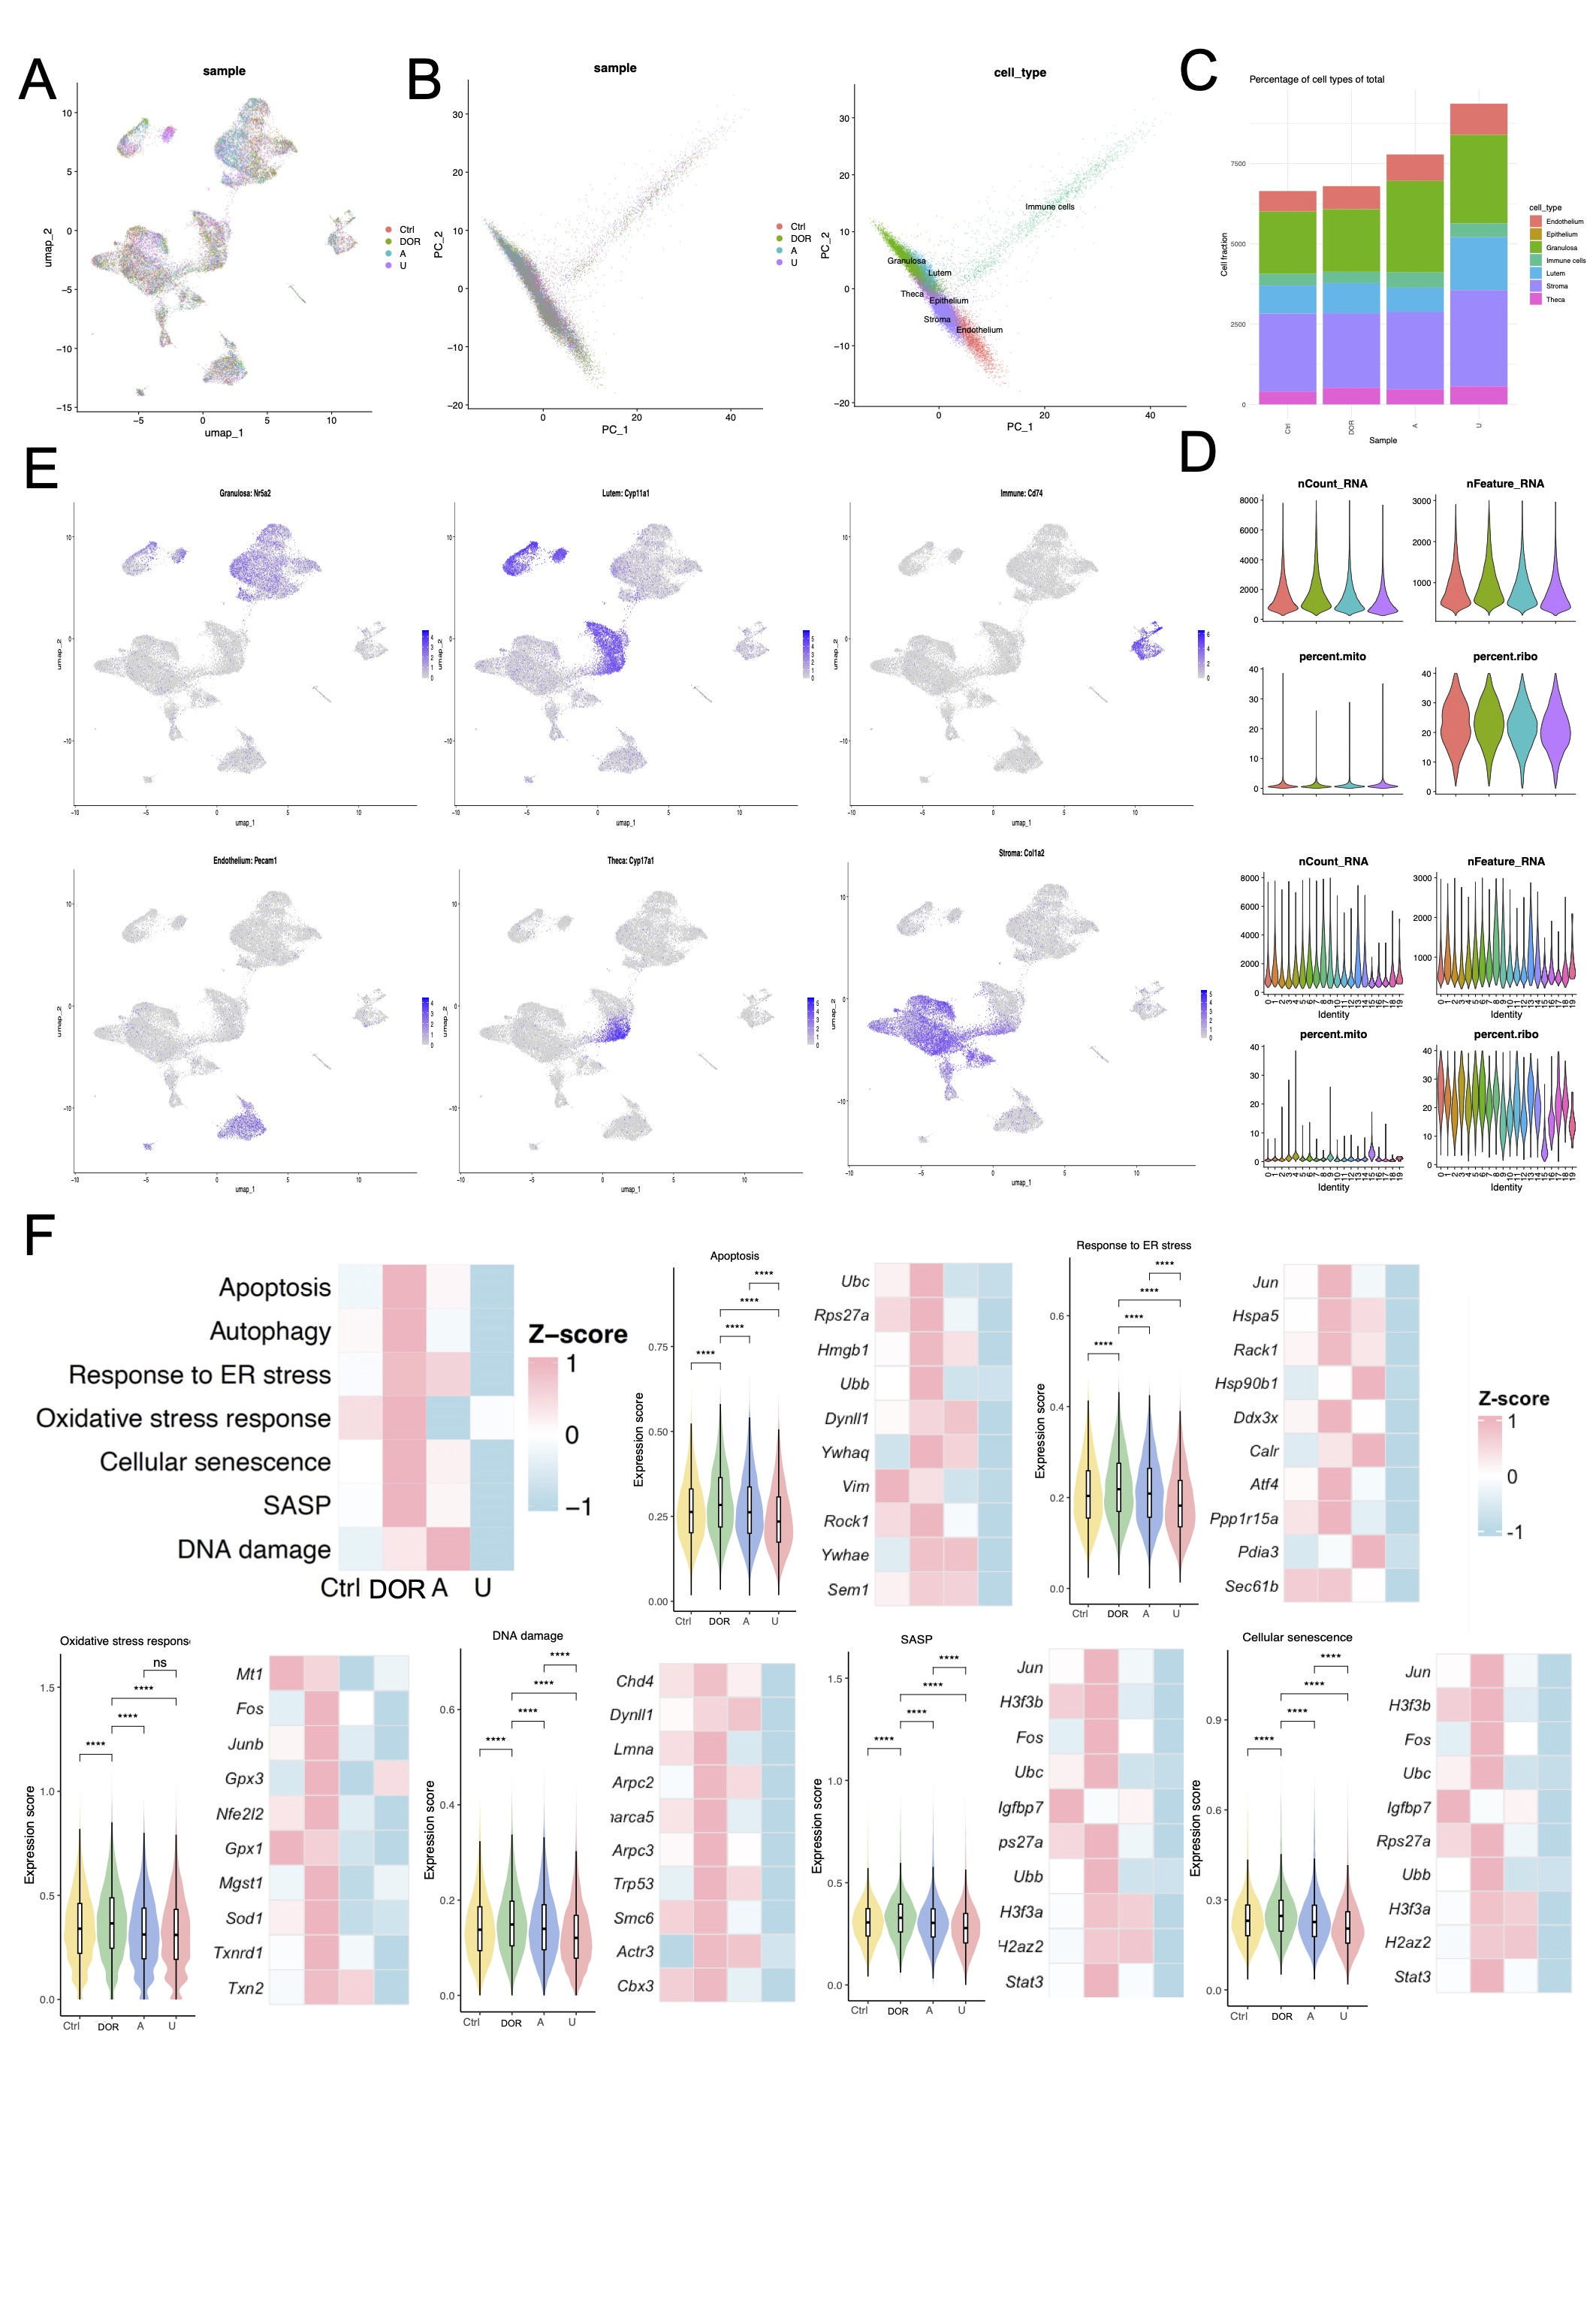


**Supplementary Fig. S3** Quality control of scRNA-seq analysis and overall ovarian aging scores.(A) UMAP plots showing the distribution of cells from four groups (Ctrl, DOR, A, and U).(B) PCA plots showing the distribution by group (left) and by cell type (right), identifying seven major ovarian cell populations: granulosa cells, luteal cells, theca cells, stromal cells, epithelial cells, endothelial cells, and immune cells.(C) Stacked bar plots showing the relative proportions of the seven ovarian cell types across the four groups.(D) Violin plots displaying quality control metrics for each group (top) and for identified cell clusters (bottom), including the number of detected transcripts (nCount_RNA), number of expressed genes (nFeature_RNA), percentage of mitochondrial genes (percent.mito), and percentage of ribosomal genes.(E) UMAP plots showing representative marker gene expression for each ovarian cell type: Nr5a2 for granulosa cells, Cyp11a1 for luteal cells, Cd74 for immune cells, Pecam1 for endothelial cells, Cyp17a1 for theca cells, and Col1a2 for stromal cells. Color intensity represents normalized expression levels.(F) Heatmap showing representative gene set scores of aging- and damage-related genes rescued by A-EV and U-EV in the ovary. Violin plots display representative gene set scores rescued by A-EV or U-EV across different groups. Statistical significance was determined by the Wilcoxon rank-sum test. Heatmap shows expression changes of representative genes in the indicated gene sets across groups.

**
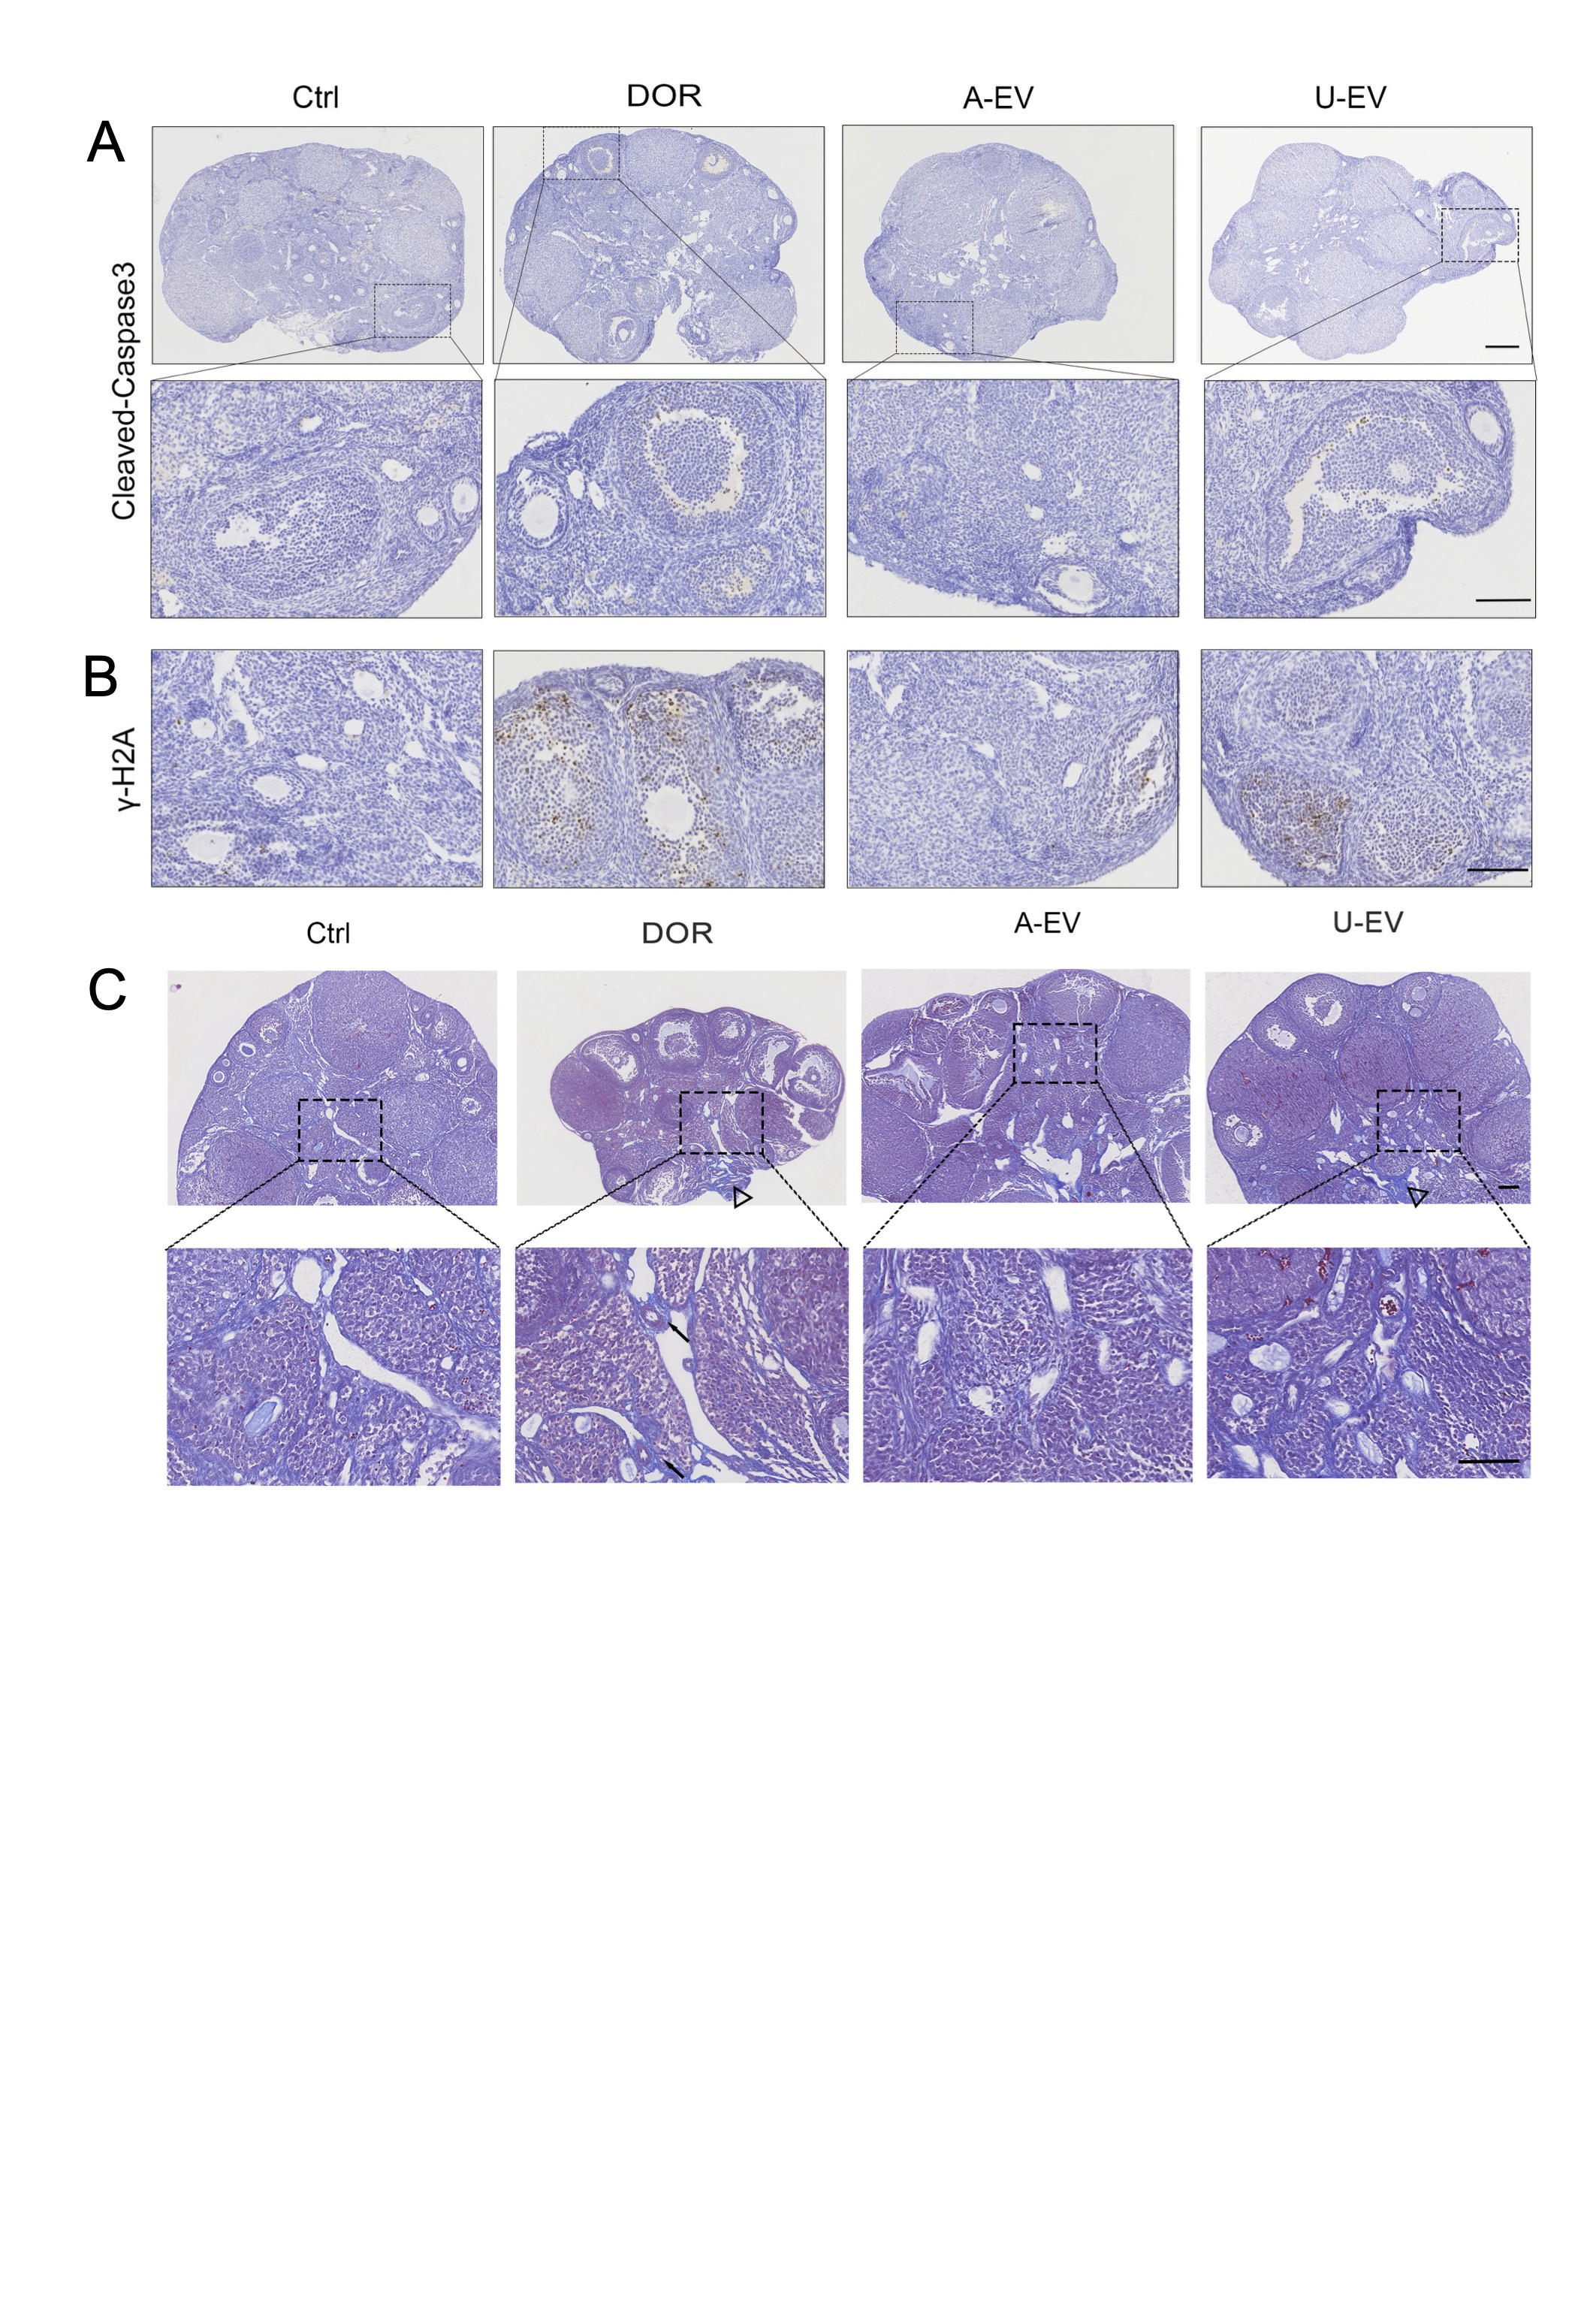
**

**Supplementary Fig. S4** U-EV and A-EV alleviate granulosa cell senescence and damage. (A–B) Immunohistochemical staining of Cleaved-Caspase3 and γ-H2A showing expression levels in different groups. Scale bars, 100 μm.(C) Masson’s trichrome staining of ovaries from each group. Scale bars, 100 μm.


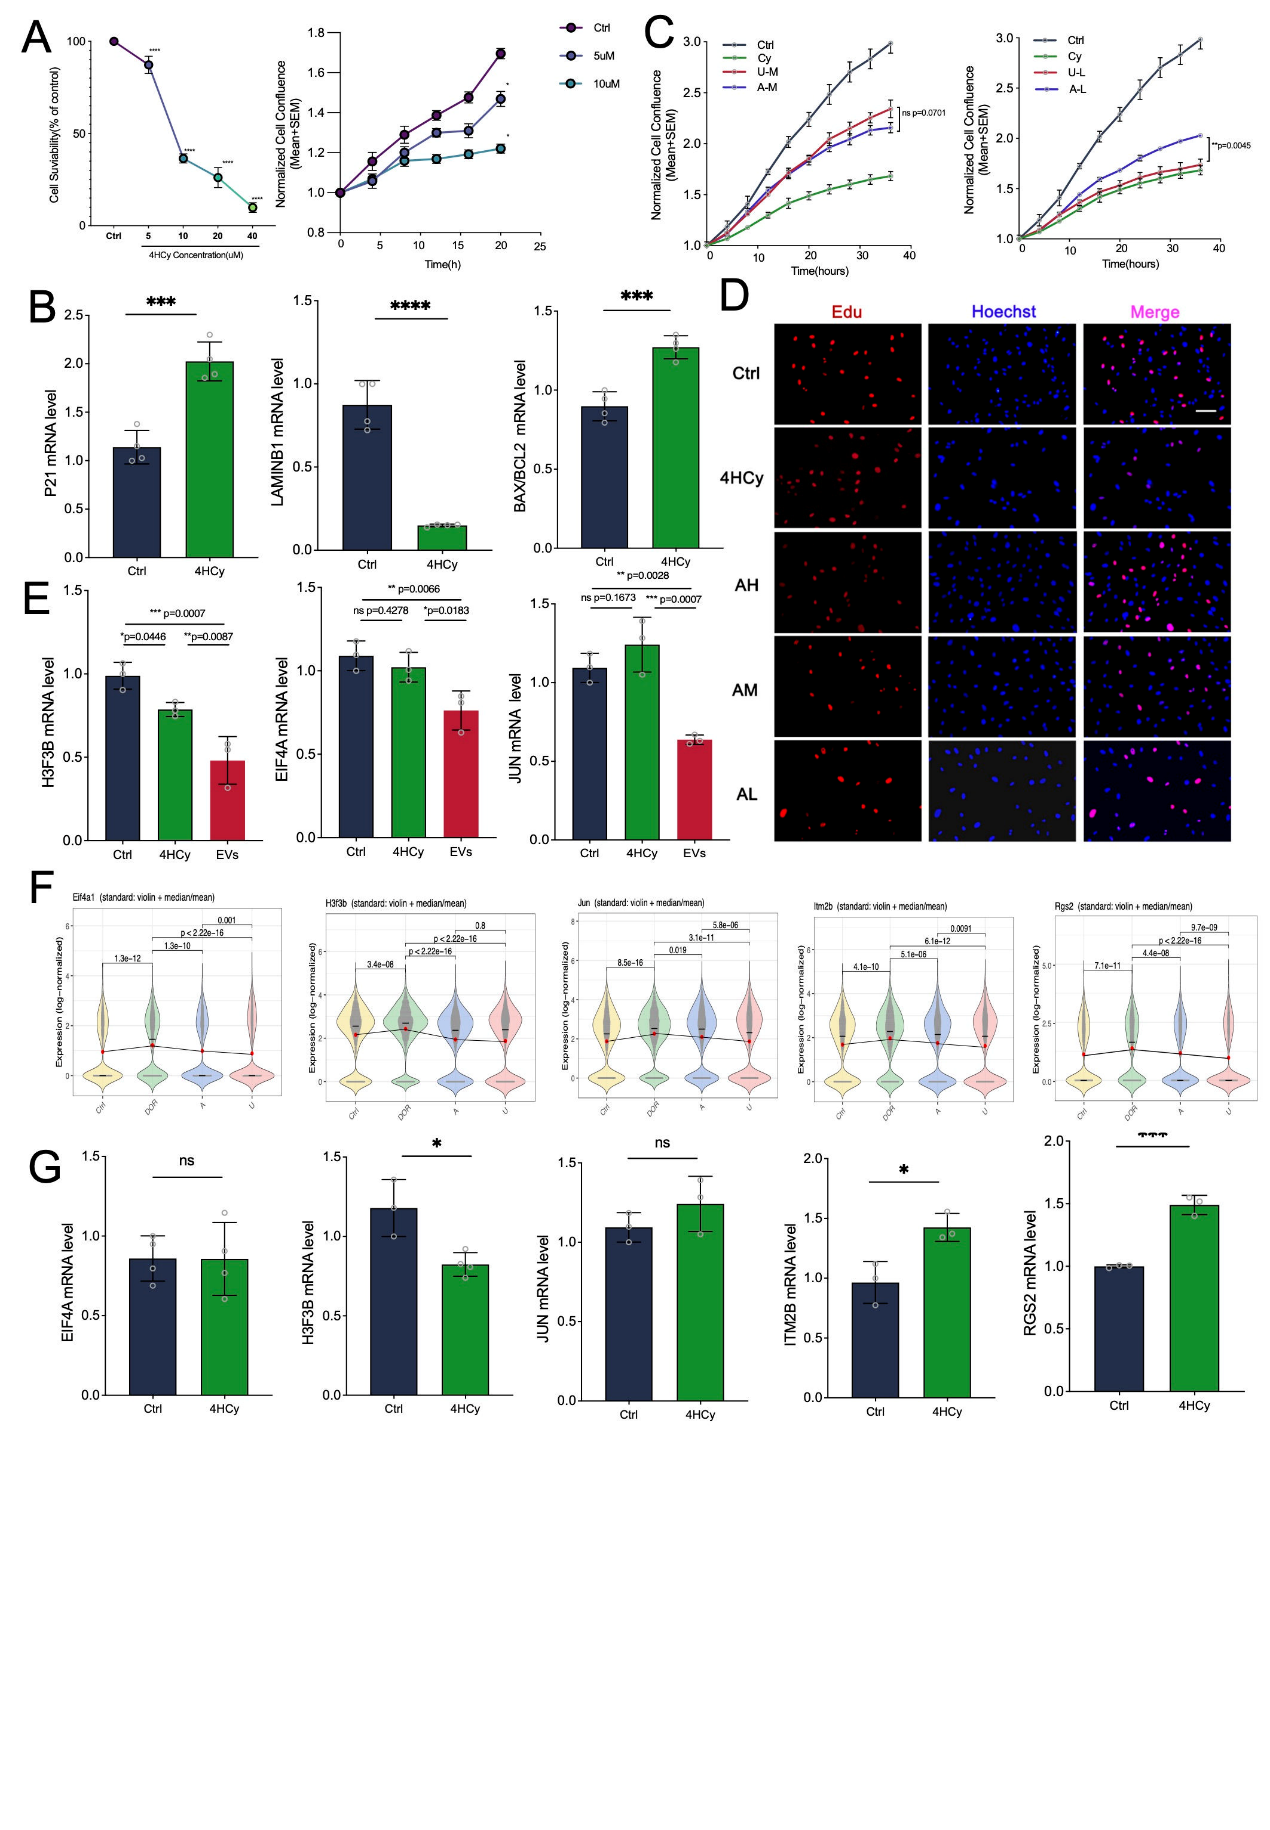


**Supplementary Fig. S5** Establishment and validation of the 4HCy-induced KGN cell injury model. (A) CCK8 assay and Incucyte analysis showing cell viability and proliferation after treatment with different concentrations of 4HCy in KGN cells.(B) qPCR analysis of *P21*, *LMNB1*, *BAX,* and *BCL2* mRNA levels in the 4HCy-induced KGN model. (C) Cell confluence of 4HCy-KGN cells after low- or moderate-dose A-EV and U-EV treatment.(D) Edu staining showing positive cells after treatment with different doses of A-EV. Scale bars, 50 μm.(E) qPCR analysis of *H3F3B*, *EIF4A*, and *JUN* mRNA levels after EV treatment.(F) Expression levels of *H3F3B*, *EIF4A*, *JUN*, *ITM2B* and *RGS2* in granulosa cells from ovarian scRNA-seq data. (G) qPCR validation of *H3F3B*, *EIF4A*, *JUN*, *ITM2B* and *RGS2* mRNA levels in the 4HCy-KGN model.

**Supplementary Tables**

**Supplementary Table 1 Primer sequences**

| Primer Name | Primer Sequence (5′–3′) |
| --- | --- |
| h-JUN | F: TCCAAGTGCCGAAAAAGGAAG |
| h-JUN | R: CGAGTTCTGAGCTTTCAAGGT |
| h-H3F3B | F: GTGGCGCTTCGAGAGATTC |
| h-H3F3B | R: GCGAGCCAACTGGATGTCTT |
| h-ITM2B | F: TACAAACTGCAACGCAGAGAA |
| h-ITM3B | R: AAATGCCGAATTGCGAAACAA |
| h-RGS2 | F: AAGATTGGAAGACCCGTTTGAG |
| h-RGS2 | R: GCAAGACCATATTTGCTGGCT |
| h-EIF4A1 | F: ATGGCACTAGGAGACTACATGG |
| h-EIF4A2 | R: CCACGGCTTAACATTTCGTCA |
| h-GAPDH | F: GCAGGGGGGAGCCAAAAGGGT |
| h-GAPDH | R: TGGGTGGCAGTGATGGCATGG |
| h-BAX | F: TCAGGATGCGTCCACCAAGAAG |
| h-BAX | R: TGTGTCCACGGCGGCAATCATC |
| h-BCL2 | F: TTGCCAGCCGGAACCTATG |
| h-BCL2 | R: CGAAGGCGACCAGCAATGATA |
| h-LAMNB1 | F: GAGAGCAACATGATGCCCAAGTG |
| h-LAMNB2 | R: GTTCTTCCCTGGCACTGTTGAC |

**Supplementary Table 2 SiRNA sequences.**

| siRNA Name | RNA Sequence(5′–3′) |
| --- | --- |
| h-JUN | CGGACCTTATGGCTACAGTAA |
| RGS2 | CCCAGAATATACAAGAAGCTA |
| ITM2B | CCCAGAAACCTACTGGAGTTA |
| EIF4A1 | GCCGTAAAGGTGTGGCTATTA |
| H3F3B | GGTGGGTCTGTTCGAAGATAC |

**Supplementary Table 3 Specific marker genes for each ovarian cell clusters.**

| Celltype | Marker |
| --- | --- |
| Granulosa cell | Nr5a2, Fshr, Amh, Wt1, Fshr, Cyp19a1, Foxl2 |
| Stroma cell | Col1a1, Col1a2, Col5a1, Col6a1, Ogn, Bgn, Dcn, Lum, Pdgfra, Mgp, Notch3 |
| Luteal cell | Prlr, Cyp11a1, Lhcgr |
| Theca cell | Cyp17a1 |
| Immune cells | Lyz2, Laptm5, H2Aa, Cd74, Fcer1g, Ctss, C1qb, C1qc, Cd52 |
| Endothelium cell | Pecam1, Kdr, Cldn5, Cdh5, Egfl7 |

**Supplementary Table 4 Specific marker genes for GCs subclusters.**

| Celltype | Gene marker |
| --- | --- |
| preantral GCs | Igfbp5, Gatm, Col18a1 |
| antral GCs | Inhbb, Fst, Gja1 |
| mitotic GCs | Top2a, Cenpa, Racgap1 |
| atresia GCs | Pik31p1, Itih5, Ghr |
| Luteal cells | Ptgfr, Cyp11a1, Onecut2 |
